# Supplementary material
Source: PubMed Central journal article supplement (PMC5448121)
Supplement: 10.1074_M117.781963_jbc.M117.781963-1.pdf [file 10.1074_M117.781963_jbc.M117.781963-1.pdf]

Scavenger Receptor B1 (SR-B1) Profoundly Excludes High Density Lipoprotein (HDL) Apolipoprotein AII as it Nibbles HDL Cholesteryl Ester

**Baiba K. Gillard,<sup>a,b</sup> G. Randall Bassett,<sup>c</sup> Antonio M. Gotto, Jr.,<sup>a,b</sup>  
Corina Rosales,<sup>a,b</sup> and Henry J. Pownall<sup>a,b</sup>**

Supplemental Data

- 1. Table S1.** Antibody catalog numbers and dilutions
- 2. FIGURE S1.** Apo AII distribution over time during incubation of HDL with CHO-SR-B1 cells as determined by SEC

**Table S1. Antibody catalog numbers and dilutions**

| Antigen  | Type           | Species           | Dilution | Catalog Number | Source                                   |
|----------|----------------|-------------------|----------|----------------|------------------------------------------|
| apoAI    | Unconjugated   | Goat anti human   | 1/2,000  | 11A-G2b        | Academy Bio-Medical                      |
| apoAI    | HRP-conjugated | Goat anti human   | 1/500    | 11H-G1a        | Academy Bio-Medical                      |
| apoAII   | Unconjugated   | Goat anti human   | 1/1,000  | 12A-G1b        | Academy Bio-Medical                      |
| apoAII   | HRP-conjugated | Goat anti human   | 1/1,000  | 12H-G2b        | Academy Bio-Medical                      |
| apoE     | Unconjugated   | Goat anti human   | 1/2000   | 50A-G1b        | Academy Bio-Medical                      |
| apoE     | HRP-conjugated | Goat anti human   | 1/3,000  | 50H-G1a        | Academy Bio-Medical                      |
| Goat IgG | HRP-conjugated | Chicken anti goat | 1/20,000 | AP163P         | Chemicon International<br>/EMD Millipore |

Figure S1

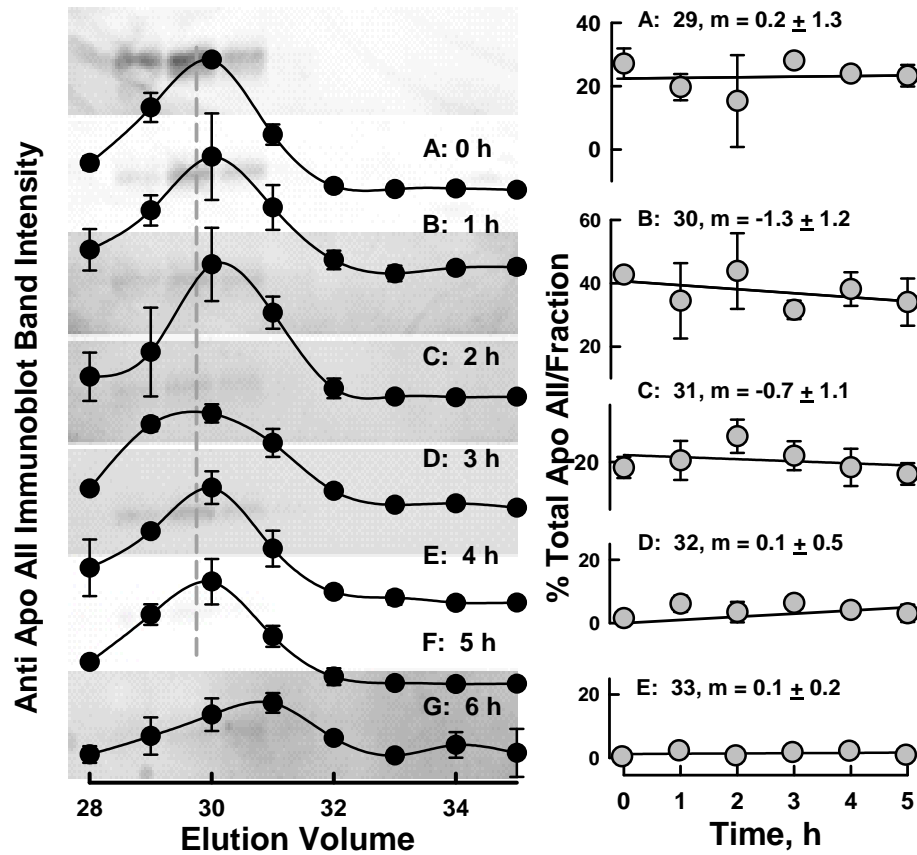

**FIGURE S1.** Apo AII distribution over time during incubation of HDL with CHO-SR-B1 cells as determined by SEC. Left Panel: Anti-apoAII immunoblots of SEC fractions overlaid with plots of the band intensities vs EV. Time of incubation is noted in each section. Compare this to the apo AI distribution shown in **Figure 5B**. Right Panel: Plots of the percent of the total apoAII per fraction as a function of time. SEC fractions are indicated by their respective EVs, 29 to 33 mL, as indicated for each plot. Slopes  $m$  and standard errors were calculated from a linear fit to the data. None of these slopes were significantly different from zero. Compare this to the plots for apoAI shown in **Figure 6A**.
